# Supplementary material for: Biochemical investigations using mass spectrometry to monitor JMJD6-catalysed hydroxylation of multi-lysine containing bromodomain-derived substrates
Source: Royal Society of Chemistry journal article supplement (doi:10.1039/d4cb00311j), 2025-01-01
Supplement: d4cb00311j1.pdf [file d4cb00311j1.pdf]

## Supplementary Information

### **Biochemical investigations using mass spectrometry to monitor JMJD6-catalysed hydroxylation of multi-lysine containing bromodomain-derived substrates**

Thomas P. Corner<sup>1,+,#</sup>, Eidarus Salah<sup>1,+</sup>, Anthony Tumber<sup>1,+</sup>, Lennart Brewitz<sup>1,\*</sup>, and  
Christopher J. Schofield<sup>1,\*</sup>

<sup>1</sup>Chemistry Research Laboratory, Department of Chemistry and the Ineos Oxford Institute for  
Antimicrobial Research, University of Oxford, 12 Mansfield Road, OX1 3TA, Oxford,  
United Kingdom.

\*Email: [lennart.brewitz@chem.ox.ac.uk](mailto:lennart.brewitz@chem.ox.ac.uk), [christopher.schofield@chem.ox.ac.uk](mailto:christopher.schofield@chem.ox.ac.uk)

<sup>+</sup>These authors contributed equally to this work.

<sup>#</sup>Present Address: Department of Molecular, Cellular, and Developmental Biology, Yale  
University, New Haven, Connecticut 06511, United States of America.

---

#### Table of contents

|                          |         |
|--------------------------|---------|
| 1. Abbreviations         | 2 - 3   |
| 2. Supplementary figures | 4 - 19  |
| 3. References            | 20 - 21 |

## 1. Abbreviations

|                               |                                                               |
|-------------------------------|---------------------------------------------------------------|
| 2OG                           | 2-oxoglutarate                                                |
| AR                            | androgen receptor                                             |
| AR-V7                         | androgen receptor slice variant 7                             |
| AspH                          | aspartate/asparagine $\beta$ -hydroxylase                     |
| BBOX                          | $\gamma$ -butyobetaine hydroxylase                            |
| BID                           | basic residue enriched interaction domain                     |
| BRD                           | bromodomain-containing protein                                |
| CP4H                          | collagen prolyl 4-hydroxylase                                 |
| CROP                          | cisplatin resistance-associated overexpressed protein         |
| CTAD                          | C-terminal activation domain                                  |
| DHX9                          | DExH-box helicase 9                                           |
| DKC1                          | dyskerin pseudouridine synthase 1                             |
| DSBH                          | double stranded $\beta$ -helix                                |
| EGFD                          | epidermal growth factor-like domain                           |
| ER $\alpha$                   | estrogen receptor- $\alpha$                                   |
| FECH                          | ferrochelatase                                                |
| FIH                           | factor inducible hypoxia inducible factor- $\alpha$           |
| FLT1                          | vascular endothelial growth factor receptor 1                 |
| GBB                           | $\gamma$ -butyobetaine                                        |
| H3/4                          | histone 3/4                                                   |
| HIF                           | hypoxia-inducible factor                                      |
| HSP70                         | heat shock protein 70                                         |
| JMJD6                         | Jumonji-C domain-containing protein 6                         |
| KDM                           | histone $N^{\epsilon}$ -methyl lysine demethylase             |
| $K_m^{\text{app}}$            | apparent Michaelis constant                                   |
| $k_{\text{cat}}^{\text{app}}$ | turnover number                                               |
| LAA                           | <i>L</i> -ascorbic acid                                       |
| LC-MS                         | liquid chromatography-mass spectrometry                       |
| LUC7L2                        | LUC7-like 2                                                   |
| MALDI-MS                      | matrix-assisted laser desorption/ionization mass spectrometry |
| MINA53                        | MYC-induced nuclear antigen                                   |
| mRNA                          | messenger ribonucleic acid                                    |

|                         |                                                     |
|-------------------------|-----------------------------------------------------|
| NKAP                    | NF- $\kappa$ B-activating protein                   |
| NMR                     | nuclear magnetic resonance                          |
| NOG                     | <i>N</i> -oxalyglycine                              |
| NO66                    | nucleolar protein 66                                |
| PHYH                    | phytanoyl-CoA dioxygenase                           |
| RBM39                   | RNA-binding protein 39                              |
| RPL8                    | ribosomal protein L8                                |
| RPL27A                  | ribosomal protein L27A                              |
| RPS6                    | ribosomal protein S6                                |
| O <sub>2</sub>          | dioxygen                                            |
| PDB                     | protein data bank                                   |
| PHD                     | prolyl hydroxylase domain-containing protein        |
| pVHL                    | von Hippel-Lindau protein                           |
| SRSF11                  | serine and arginine rich splicing factor 11         |
| SPE-MS                  | solid-phase extraction coupled to mass spectrometry |
| TET                     | ten-eleven translocation                            |
| TRAF6                   | tumor necrosis factor receptor associated factor 6  |
| U2AF65                  | splicing factor U2 auxiliary factor 65 kDa subunit  |
| U2SURP                  | U2 SnRNP associated SURP domain containing          |
| USP42                   | ubiquitin-specific peptidase 42                     |
| $v_{\max}^{\text{app}}$ | apparent maximum velocities                         |

## 2. Supplementary figures

**Supplementary Figure S1. Recombinant human JMJD6.** Recombinant human JMJD6 (full-length with an N-terminal His<sub>6</sub>-tag) was >95% pure as analysed by sodium dodecyl sulphate polyacrylamide gel electrophoresis (SDS-PAGE) with Coomassie staining and electrospray ionization mass spectrometry (ESI-MS).

(a) 10-12% SDS-PAGE analysis of purified His<sub>6</sub>-JMJD6 after Ni(II)-affinity chromatography (HisTrap column); (b) 10-12% SDS-PAGE analysis of His<sub>6</sub>-JMJD6 after subsequent size-exclusion chromatography (Superdex 75); (c) Deconvoluted mass spectrum of purified His<sub>6</sub>-JMJD6 shows potential evidence for JMJD6 self-hydroxylation, as reported;<sup>1</sup> calculated mass of His<sub>6</sub>-JMJD6 = 49014.73 Da, observed mass: 49030.24 Da (*i.e.*, mass difference: ~ +16 Da).

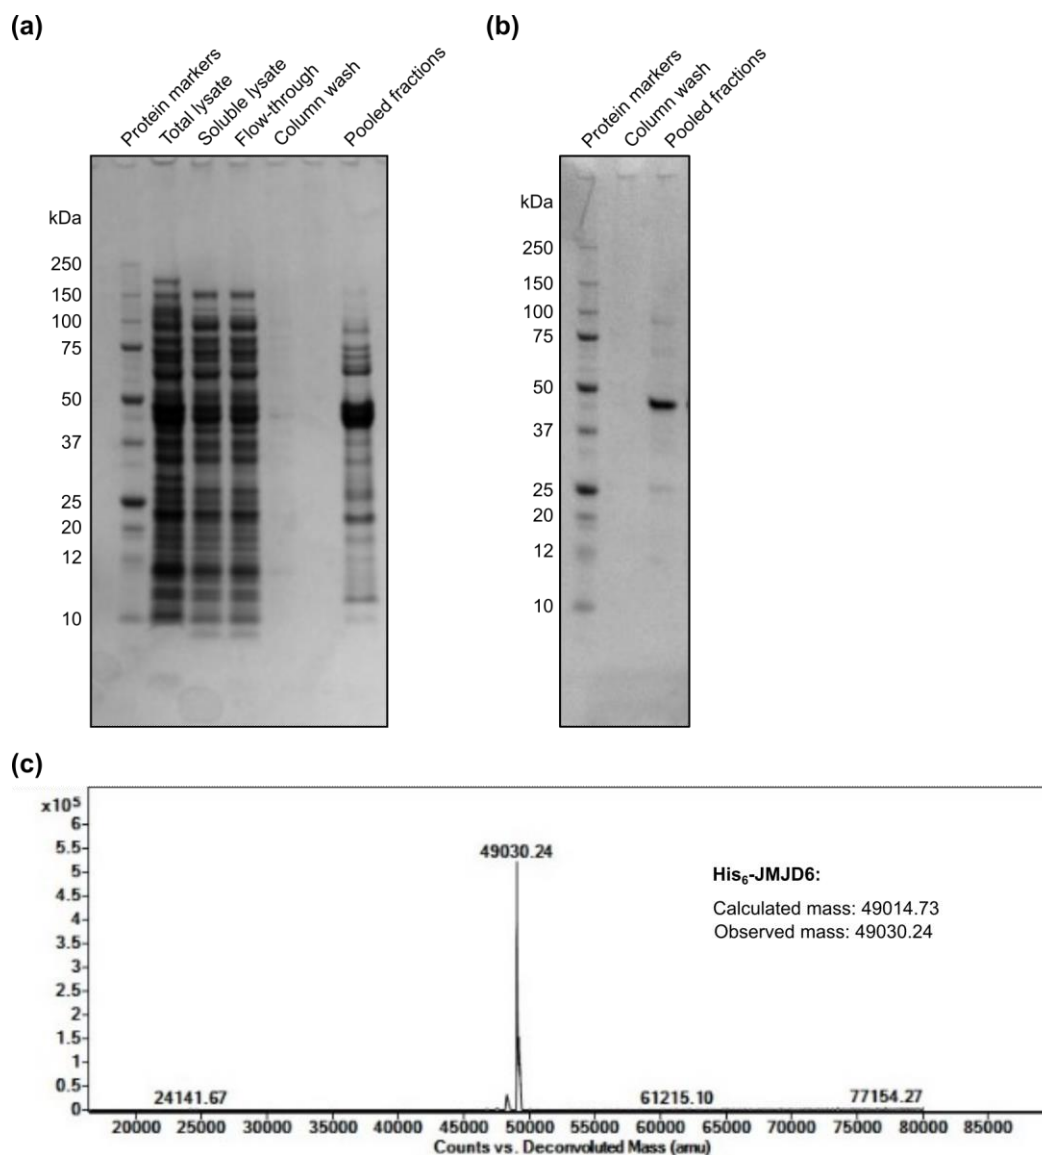

**Supplementary Figure S2. Ion counts of BRD-derived peptides measured during JMJD6-catalysed hydroxylation.** The sum of the MS ion counts of the substrate peptide and all hydroxylated product peptides (black line) remains approximately constant throughout the JMJD6-catalysed reactions of: (a) BRD2<sub>520-559</sub>, (b) BRD3<sub>463-502</sub> and (c) BRD4<sub>511-550</sub>. The results indicate that the SPE-MS assays are sufficiently robust to enable quantification of the extent of the JMJD6-catalysed BRD2<sub>520-559</sub>, BRD3<sub>463-502</sub> and BRD4<sub>511-550</sub> hydroxylation. Hydroxylation reactions were performed as described in the Experimental Procedures section using His<sub>6</sub>-JMJD6 (0.05  $\mu$ M), 2OG (200  $\mu$ M), (NH<sub>4</sub>)<sub>2</sub>Fe(SO<sub>4</sub>)<sub>2</sub>·6H<sub>2</sub>O (FAS; 2  $\mu$ M), BRD substrate (2  $\mu$ M) and *L*-ascorbic acid (LAA; 100  $\mu$ M) in Tris buffer (50 mM, pH 7.5).

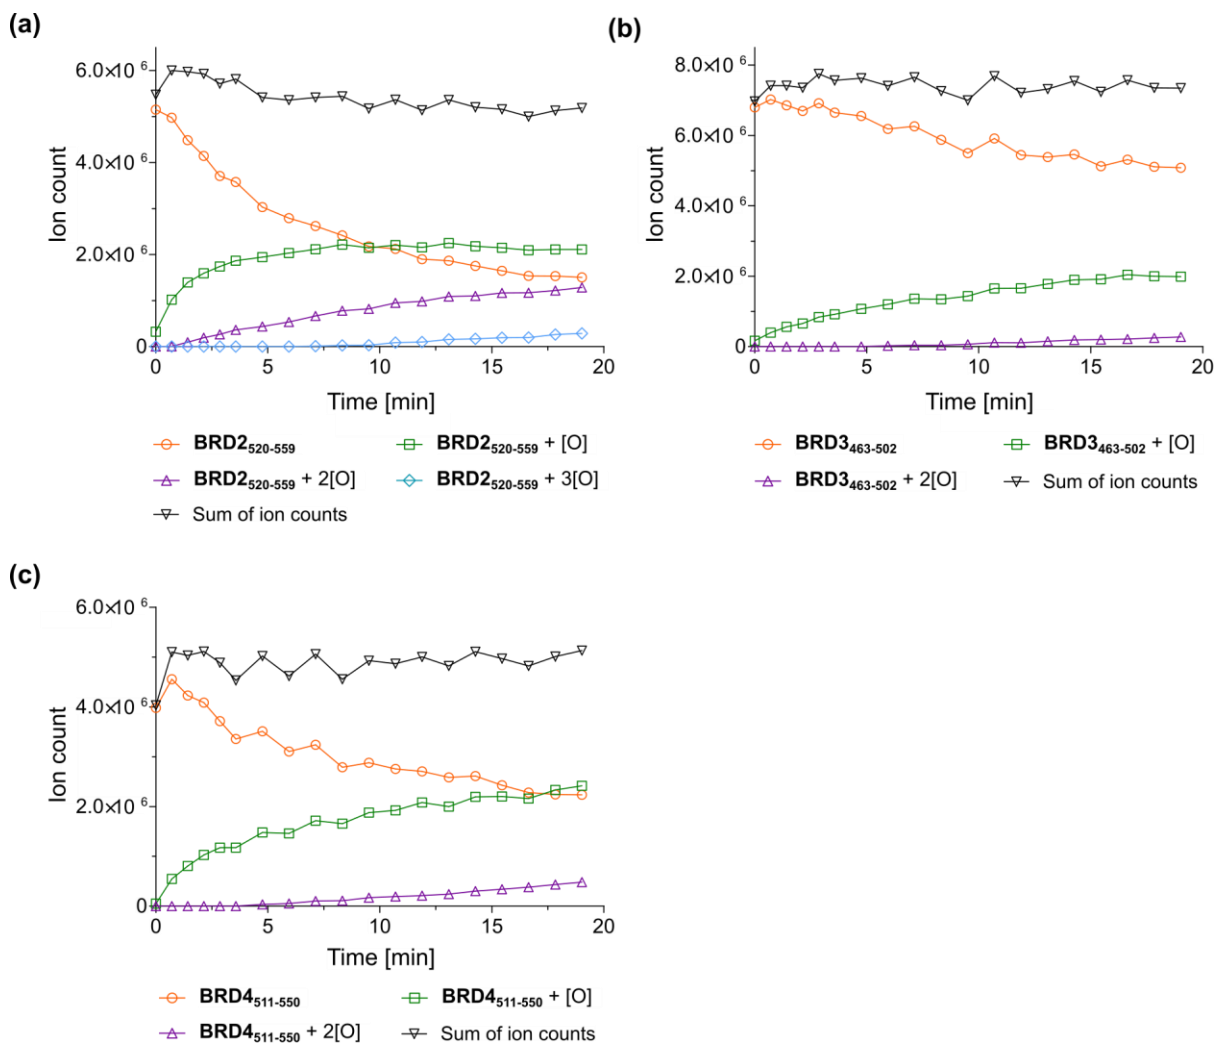

**Supplementary Figure S3. Determination of the JMJD6 kinetic parameters for 2OG (continues on the following page).** SPE-MS was used to determine the extent of JMJD6-catalysed mono- and di-hydroxylation of the BRD4<sub>511-550</sub> fragment peptide for the specified 2OG concentrations. Initial rates of the JMJD6-catalysed mono-hydroxylation of BRD4<sub>511-550</sub> were used to determine the maximum velocity ( $v_{max}^{app}$ ) and Michaelis constant ( $K_m^{app}$ ) of JMJD6 for 2OG. Measurement times were normalized to the first sample injection analysed after the addition of the JMJD6 enzyme mixture to the substrate mixture (containing 2OG, FAS, LAA, and BRD4<sub>511-550</sub>), by which time low levels of BRD4<sub>511-550</sub> mono-hydroxylation were manifest. Data are the mean of three independent runs (n = 3; mean ± standard deviation, SD). Conditions: His<sub>6</sub>-JMJD6 (50 nM), 2OG (as specified), FAS (2 μM), BRD4<sub>511-550</sub> (2 μM) and LAA (100 μM) in Tris buffer (50 mM, pH 7.5).

(a) Abundance of the mono-hydroxylated BRD4<sub>511-550</sub> peptide, following the addition of 50 nM JMJD6 to the substrate mixture (t = 0 min), for the specified 2OG concentrations; (b) initial reaction velocities used for the kinetic analysis of the JMJD6-catalysed mono-hydroxylation of BRD4<sub>511-550</sub>; (c) Michaelis-Menten curve used to determine the kinetic parameters of JMJD6 for 2OG. The JMJD6  $v_{max}^{app}$  and  $K_m^{app}$  values of JMJD6 for 2OG are  $3.5 \pm 0.1 \cdot 10^{-3} \mu\text{M} \cdot \text{s}^{-1}$  and  $23.3 \pm 2.5 \mu\text{M}$ , respectively, as determined by non-linear regression; (d-l) time course of the JMJD6-catalysed hydroxylation of BRD4<sub>511-550</sub> showing the relative abundance of the BRD4<sub>511-550</sub> substrate (BRD4<sub>511-550</sub>; orange circles), mono-hydroxylated BRD4<sub>511-550</sub> (BRD4<sub>511-550</sub> + [O]; green squares) and di-hydroxylated BRD4<sub>511-550</sub> (BRD4<sub>511-550</sub> + 2[O]; purple triangles), in the presence of varied 2OG concentrations: (d) 400 μM; (e) 200 μM; (f) 100 μM; (g) 50 μM; (h) 25 μM; (i) 12.5 μM; (j) 6.25 μM; (k) 3.13 μM; (l) 0 μM. No evidence for triple (or higher order) BRD4<sub>511-550</sub> hydroxylation was observed under the employed reaction conditions.

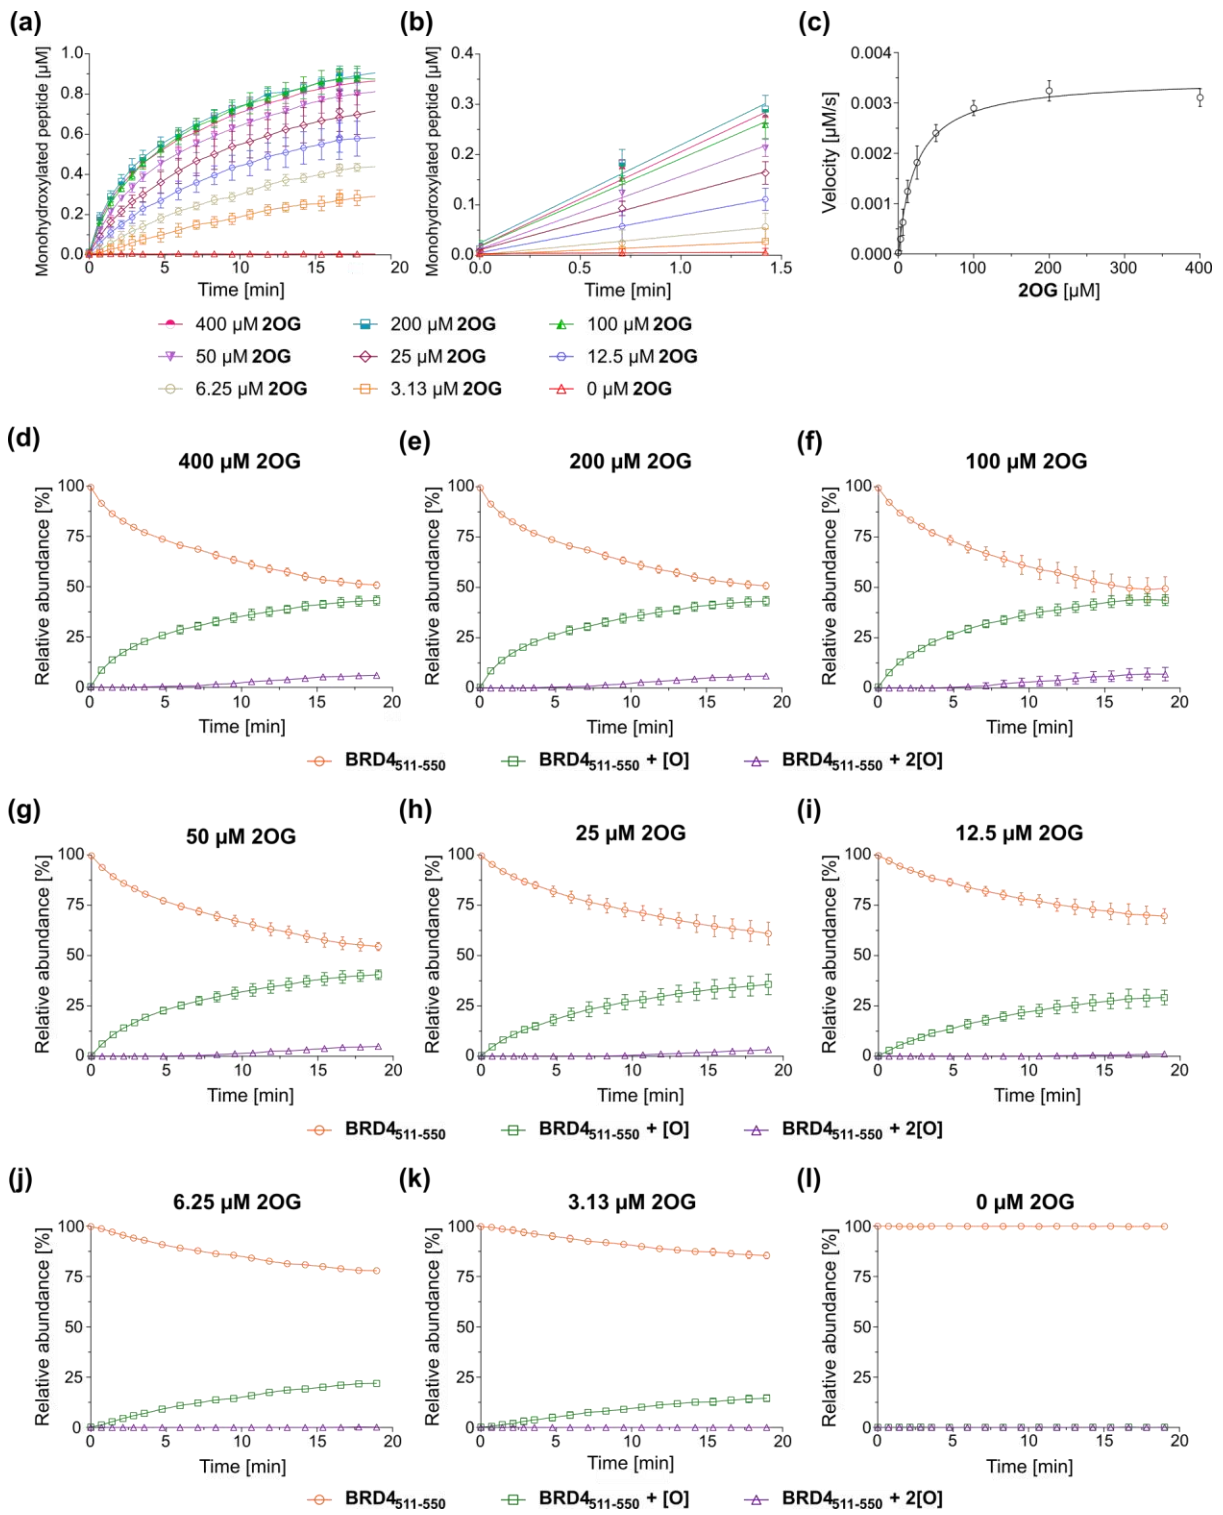

**Supplementary Figure S4. Determination of the JMJD6 kinetic parameters for Fe(II) (continues on the following page).** SPE-MS was used to determine the extent of JMJD6-catalysed mono- and di-hydroxylation of the BRD4<sub>511-550</sub> fragment peptide for the specified Fe(II) concentrations. Initial rates of the JMJD6-catalysed mono-hydroxylation of BRD4<sub>511-550</sub> were used to determine the maximum velocity ( $v_{max}^{app}$ ) and apparent Michaelis constant ( $K_m^{app}$ ) of JMJD6 for Fe(II). Measurement times were normalized to the first sample injection analysed after the addition of the JMJD6 enzyme mixture into the substrate mixture, by which time low levels of BRD4<sub>511-550</sub> mono-hydroxylation were manifest. Data are the mean of three independent runs (n = 3; mean  $\pm$  SD). Conditions: His<sub>6</sub>-JMJD6 (50 nM), 2OG (200  $\mu$ M), FAS (as specified), BRD4<sub>511-550</sub> (2  $\mu$ M) and LAA (100  $\mu$ M) in Tris buffer (50 mM, pH 7.5).

(a) Abundance of the mono-hydroxylated BRD4<sub>511-550</sub> peptide, following the addition of 50 nM JMJD6 to the substrate mixture (t = 0 min), for the specified Fe(II) concentrations; (b) initial reaction velocities used for the kinetic analysis of the JMJD6-catalysed mono-hydroxylation of BRD4<sub>511-550</sub>; (c) Michaelis-Menten curve used to determine the kinetic parameters of JMJD6 for Fe(II). The JMJD6  $v_{max}^{app}$  and  $K_m^{app}$  values of JMJD6 for Fe(II) are  $3.6 \pm 0.1 \cdot 10^{-3} \mu\text{M} \cdot \text{s}^{-1}$  and  $0.19 \pm 0.02 \mu\text{M}$ , respectively, as determined by non-linear regression; (d-k) time course of the JMJD6-catalysed hydroxylation of BRD4<sub>511-550</sub> showing the relative abundance of the BRD4<sub>511-550</sub> substrate (BRD4<sub>511-550</sub>; orange circles), mono-hydroxylated BRD4<sub>511-550</sub> (BRD4<sub>511-550</sub> + [O]; green squares) and di-hydroxylated BRD4<sub>511-550</sub> (BRD4<sub>511-550</sub> + 2[O]; purple triangles), in the presence of varied Fe(II) concentrations: (d) 4  $\mu$ M; (e) 2  $\mu$ M; (f) 1  $\mu$ M; (g) 0.5  $\mu$ M; (h) 0.25  $\mu$ M; (i) 0.125  $\mu$ M; (j) 0.063  $\mu$ M; (k) 0  $\mu$ M. No evidence for triple (or higher order) BRD4<sub>511-550</sub> hydroxylation was observed under the employed reaction conditions.



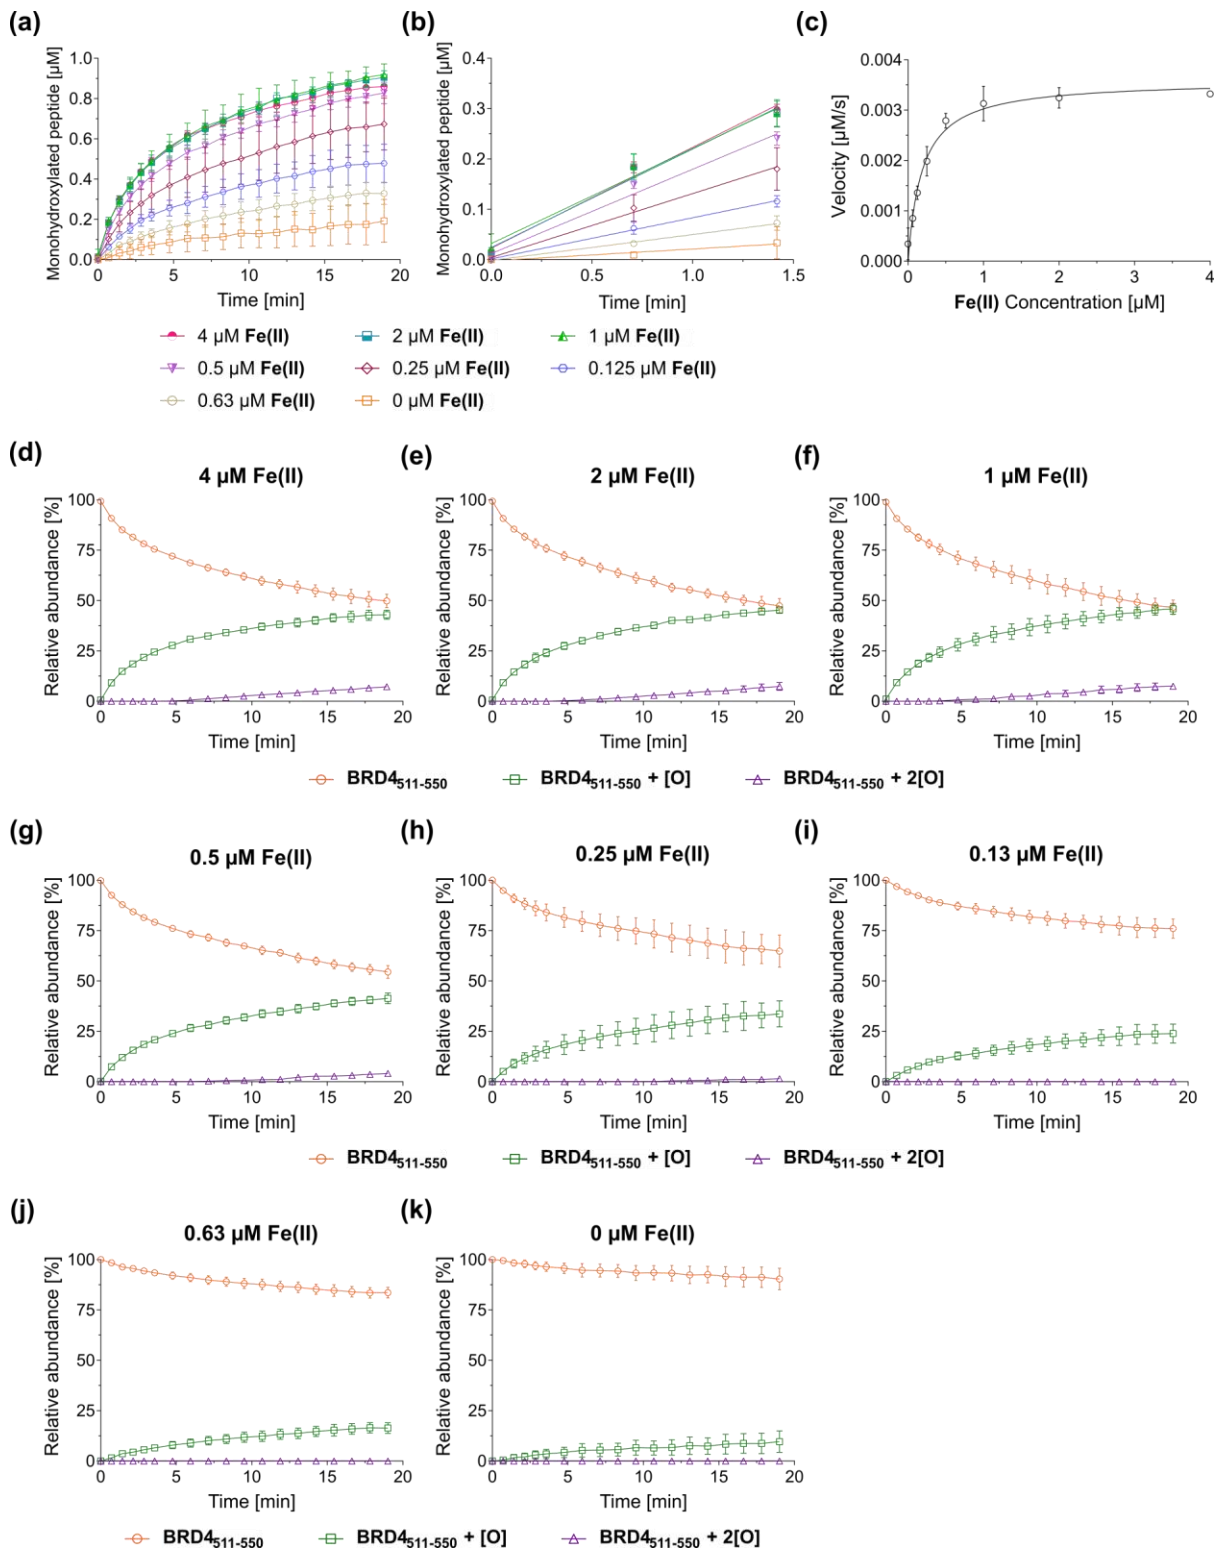

**Supplementary Figure S5. Effect of LAA on the JMJD6-catalysed hydroxylation of BRD4<sub>511-550</sub> (continues on the following page).** SPE-MS was used to determine the extent of JMJD6-catalysed mono- and di-hydroxylation of the BRD4<sub>511-550</sub> fragment peptide for the specified concentrations of L-ascorbic acid (LAA). Measurement times were normalized to the first sample injection analysed after the addition of the JMJD6 enzyme mixture to the substrate mixture, by which time low levels of BRD4<sub>511-550</sub> mono-hydroxylation were manifest. Data are the mean of three independent runs ( $n = 3$ ; mean  $\pm$  SD). Conditions: His<sub>6</sub>-JMJD6 (50 nM), 2OG (200  $\mu$ M), FAS (2  $\mu$ M), BRD4<sub>511-550</sub> (2  $\mu$ M) and LAA (as specified) in Tris buffer (50 mM, pH 7.5).

(a) Abundance of the mono-hydroxylated BRD4<sub>511-550</sub> peptide, following the addition of 50 nM JMJD6 to the substrate mixture ( $t = 0$  min), for the specified LAA concentrations; (b) initial reaction velocities used for the kinetic analysis of the JMJD6-catalysed mono-hydroxylation of BRD4<sub>511-550</sub>; (c) effect of LAA concentration on the initial reaction velocity of the JMJD6-catalysed mono-hydroxylation of BRD4<sub>511-550</sub>; (d-k) time course of the JMJD6-catalysed hydroxylation of BRD4<sub>511-550</sub> showing the relative abundance of the BRD4<sub>511-550</sub> substrate (BRD4<sub>511-550</sub>; orange circles), mono-hydroxylated BRD4<sub>511-550</sub> (BRD4<sub>511-550</sub> + [O]; green squares) and di-hydroxylated BRD4<sub>511-550</sub> (BRD4<sub>511-550</sub> + 2[O]; purple triangles), in the presence of varied LAA concentrations: (d) 100  $\mu$ M; (e) 50  $\mu$ M; (f) 25  $\mu$ M; (g) 12.5  $\mu$ M; (h) 6.25  $\mu$ M; (i) 3.13  $\mu$ M; (j) 1.56  $\mu$ M; (k) 0.78  $\mu$ M; (l) 0.39  $\mu$ M; (m) 0  $\mu$ M. No evidence for triple (or higher order) BRD4<sub>511-550</sub> hydroxylation was observed under the employed reaction conditions.

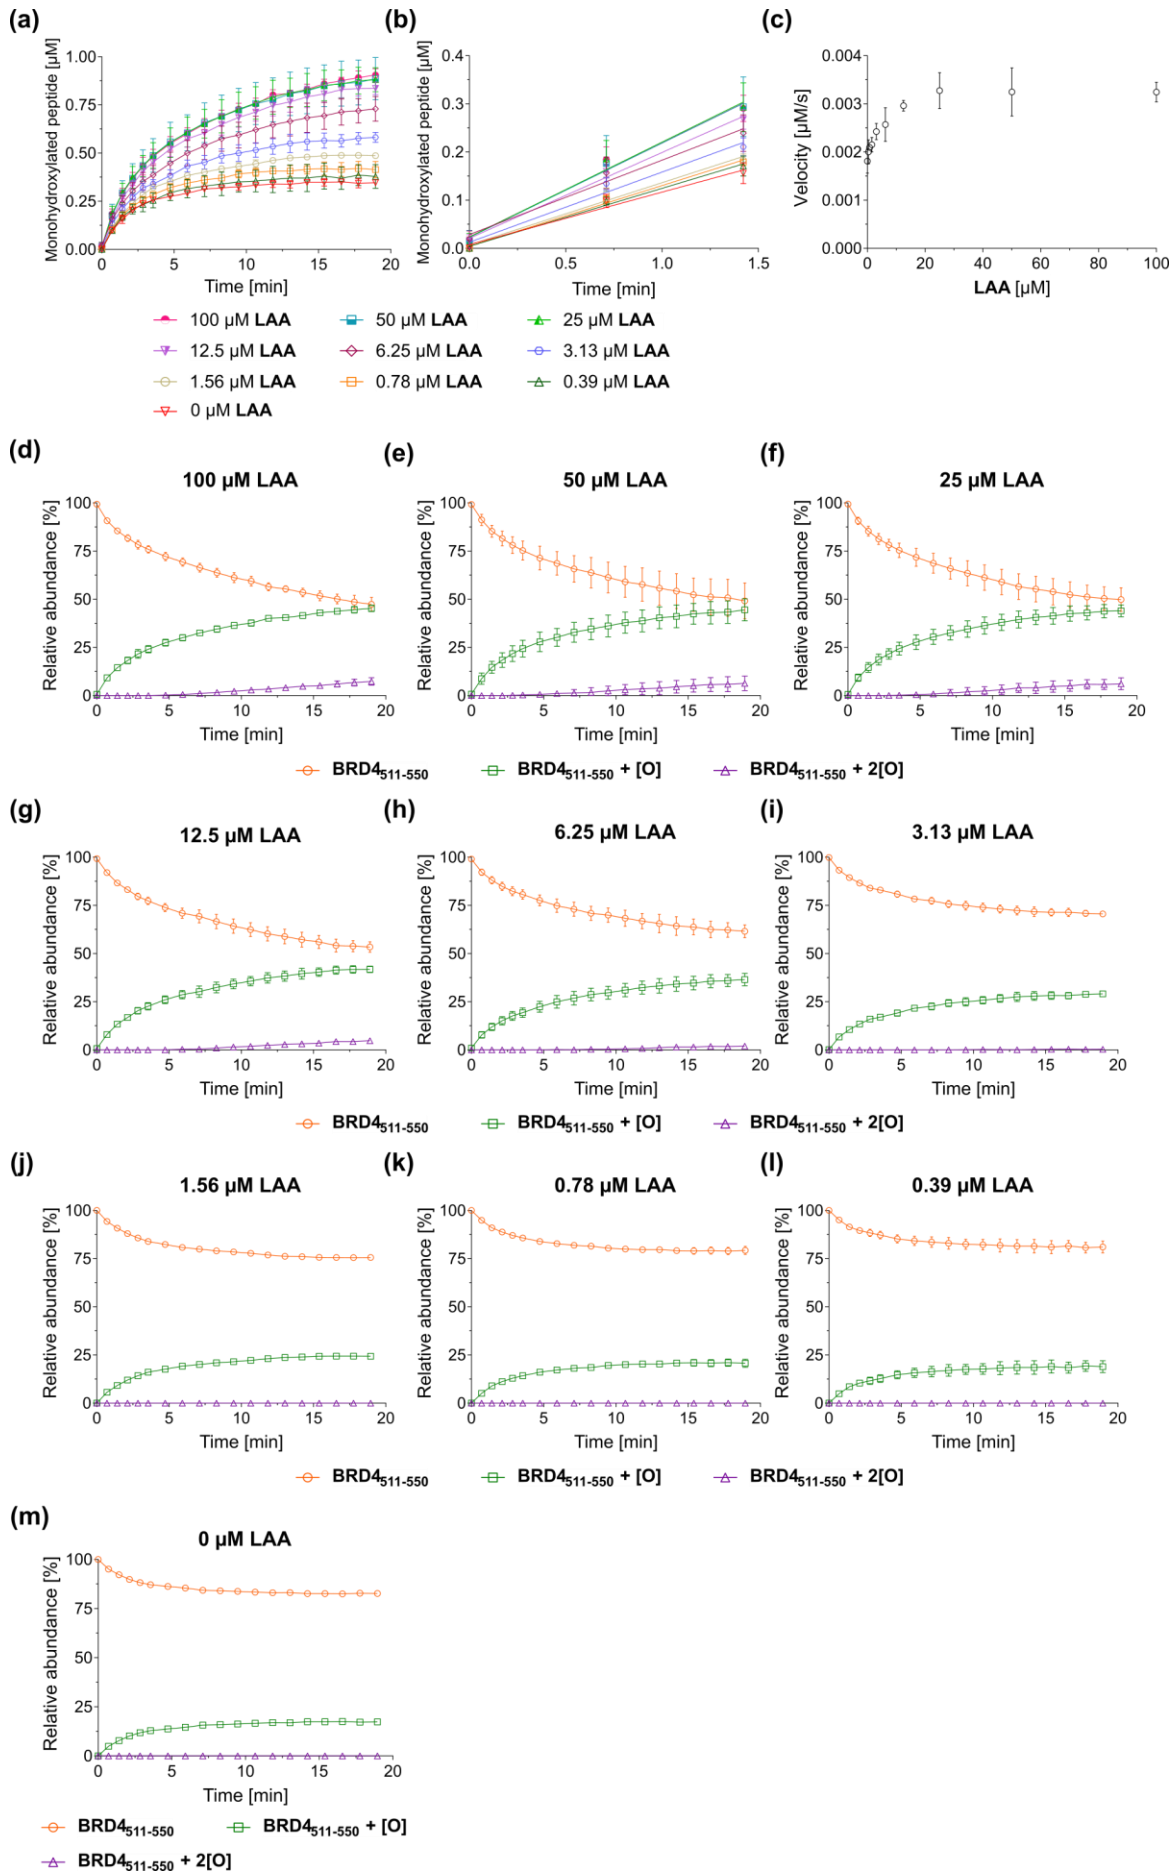

**Supplementary Figure S6. Determination of the JMJD6 kinetic parameters for BRD4<sub>511-550</sub> (continues on the following page).** SPE-MS was used to determine the extent of JMJD6-catalysed mono- and di-hydroxylation of the BRD4<sub>511-550</sub> fragment peptide for the specified BRD4<sub>511-550</sub> concentrations. Initial rates of the JMJD6-catalysed mono-hydroxylation of BRD4<sub>511-550</sub> were used to determine the maximum velocity ( $v_{max}^{app}$ ) and Michaelis constant ( $K_m^{app}$ ) of JMJD6 for BRD4<sub>511-550</sub>. Measurement times were normalized to the first sample injection analysed after the addition of the JMJD6 enzyme mixture to the substrate mixture, by which time low levels of BRD4<sub>511-550</sub> mono-hydroxylation were manifest. Data are the mean of three independent runs (n = 3; mean ± SD). Conditions: His<sub>6</sub>-JMJD6 (50 nM), 2OG (200 μM), FAS (2 μM), BRD4<sub>511-550</sub> (as specified) and LAA (100 μM) in Tris buffer (50 mM, pH 7.5).

(a) Abundance of the mono-hydroxylated BRD4<sub>511-550</sub> peptide, following the addition of 50 nM JMJD6 to the substrate mixture (t = 0 min), for the specified BRD4<sub>511-550</sub> concentrations; (b) initial reaction velocities used for the kinetic analysis of the JMJD6-catalysed mono-hydroxylation of BRD4<sub>511-550</sub>; (c) Michaelis-Menten curve used to determine the kinetic parameters of JMJD6 for BRD4<sub>511-550</sub>. The JMJD6  $v_{max}^{app}$  and  $K_m^{app}$  values of JMJD6 for BRD4<sub>511-550</sub> are  $5.8 \pm 1.2 \cdot 10^{-3} \mu\text{M} \cdot \text{s}^{-1}$  and  $0.62 \pm 0.26 \mu\text{M}$ , respectively, as determined by non-linear regression; (d-l) time course of the JMJD6-catalysed hydroxylation of BRD4<sub>511-550</sub> showing the relative abundance of the BRD4<sub>511-550</sub> substrate (BRD4<sub>511-550</sub>; orange circles), mono-hydroxylated BRD4<sub>511-550</sub> (BRD4<sub>511-550</sub> + [O]; green squares) and di-hydroxylated BRD4<sub>511-550</sub> (BRD4<sub>511-550</sub> + 2[O]; purple triangles) in the presence of varied BRD4<sub>511-550</sub> concentrations: (d) 10 μM; (e) 8 μM; (f) 6 μM; (g) 4 μM; (h) 2 μM; (i) 1 μM; (j) 0.8 μM; (k) 0.6 μM; (l) 0.4 μM. No evidence for triple (or higher order) BRD4<sub>511-550</sub> hydroxylation was observed under the employed reaction conditions.

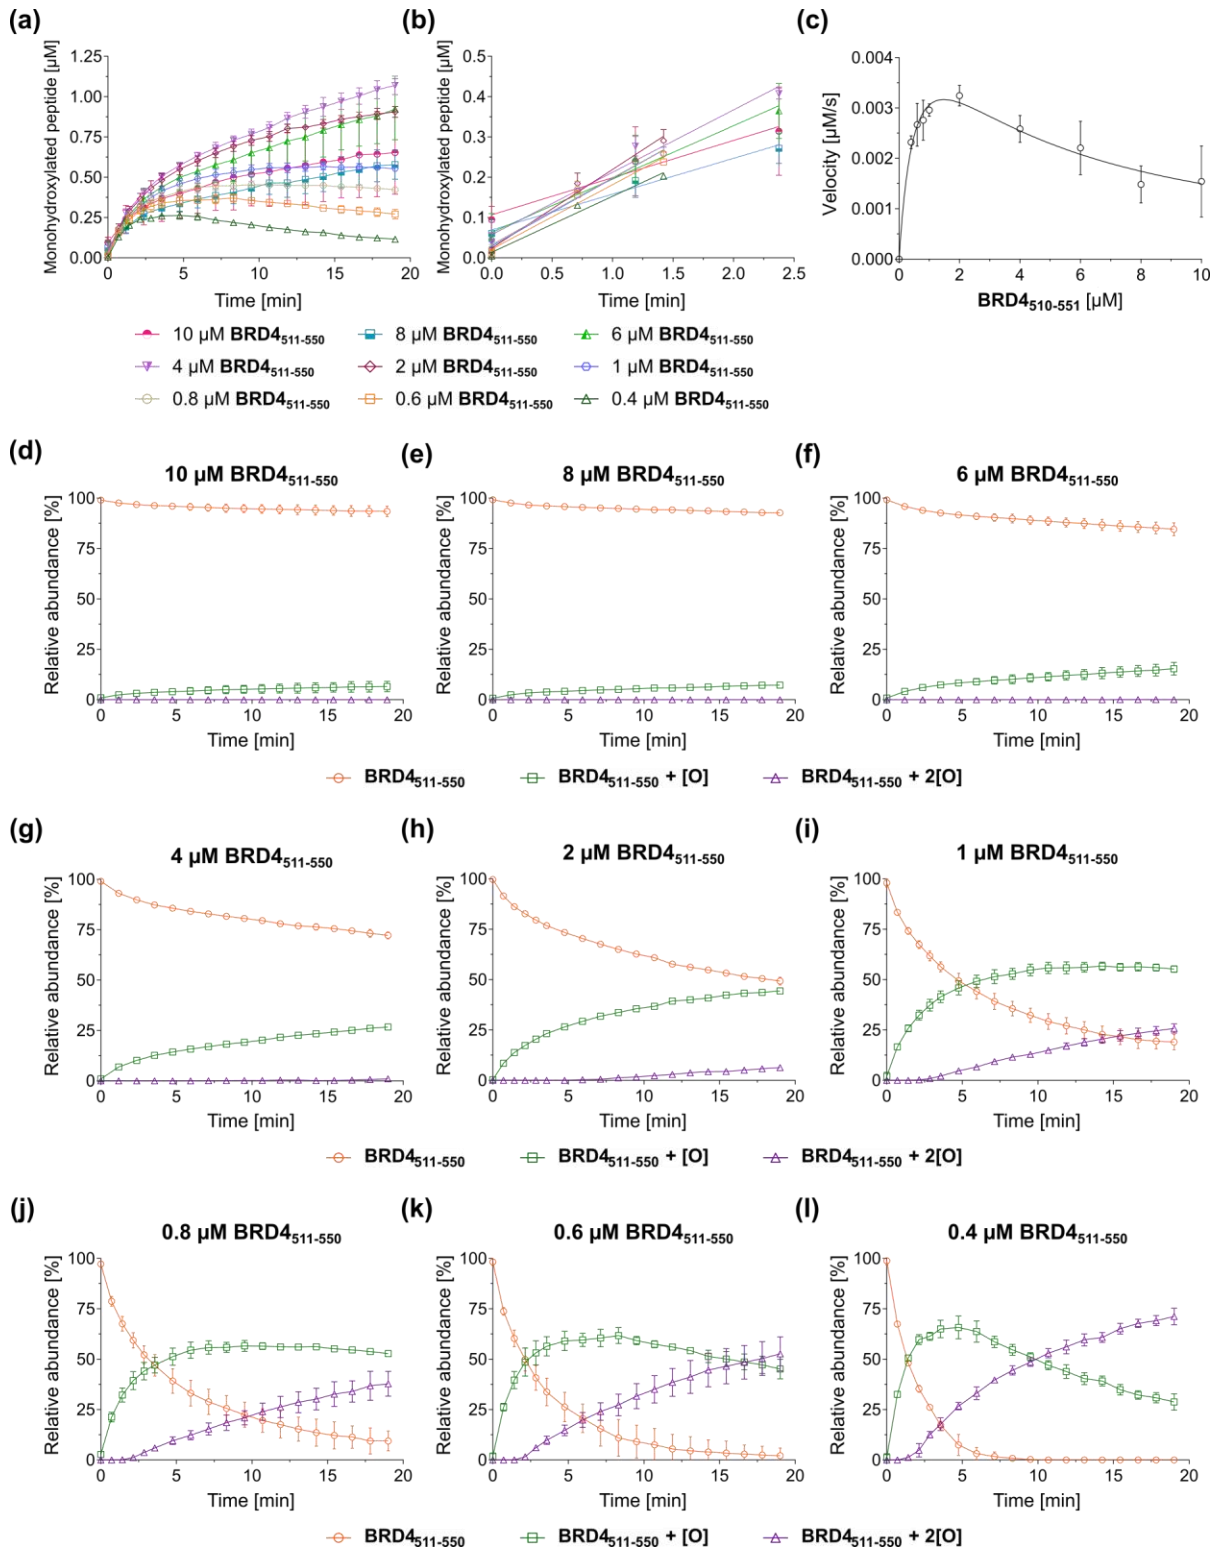

**Supplementary Figure S7. Determination of the JMJD6 kinetic parameters for BRD2<sub>520-559</sub> (continues on the following page).** SPE-MS was used to determine the extent of JMJD6-catalysed mono- and di-hydroxylation of the BRD2<sub>520-559</sub> fragment peptide for the specified BRD2<sub>520-559</sub> concentrations. Initial rates of the JMJD6-catalysed mono-hydroxylation of BRD2<sub>520-559</sub> were used to determine the maximum velocity ( $v_{max}^{app}$ ) and Michaelis constant ( $K_m^{app}$ ) of JMJD6 for BRD2<sub>520-559</sub>. Measurement times were normalized to the first sample injection analysed after addition of the JMJD6 enzyme mixture to the substrate mixture, by which time low levels of BRD2<sub>520-559</sub> mono-hydroxylation were manifest. Data are the mean of three independent runs (n = 3; mean  $\pm$  SD). Conditions: His<sub>6</sub>-JMJD6 (50 nM), 2OG (200  $\mu$ M), FAS (2  $\mu$ M), BRD2<sub>520-559</sub> (as specified) and LAA (100  $\mu$ M) in Tris buffer (50 mM, pH 7.5).

(a) Abundance of the mono-hydroxylated BRD2<sub>520-559</sub> peptide, following the addition of 50 nM JMJD6 to the substrate mixture (t = 0 min), for the specified BRD2<sub>520-559</sub> concentrations; (b) initial reaction velocities used for the kinetic analysis of the JMJD6-catalysed mono-hydroxylation of BRD2<sub>520-559</sub>; (c) Michaelis-Menten curve used to determine the kinetic parameters of JMJD6 for BRD2<sub>520-559</sub>. The JMJD6  $v_{max}^{app}$  and  $K_m^{app}$  values of JMJD6 for BRD2<sub>520-559</sub> are  $1.2 \pm 0.2 \cdot 10^{-2} \mu\text{M} \cdot \text{s}^{-1}$  and  $0.89 \pm 0.32 \mu\text{M}$ , respectively, as determined by non-linear regression; (d-m) time course of the JMJD6-catalysed hydroxylation of BRD2<sub>520-559</sub> showing the relative abundance of the BRD2<sub>520-559</sub> substrate (BRD2<sub>520-559</sub>; orange circles), mono-hydroxylated BRD2<sub>520-559</sub> (BRD2<sub>520-559</sub> + [O]; green squares), di-hydroxylated BRD2<sub>520-559</sub> (BRD2<sub>520-559</sub> + 2[O]; purple triangles), trihydroxylated BRD2<sub>520-559</sub> (BRD2<sub>520-559</sub> + 3[O]; light blue diamonds) and tetrahydroxylated BRD2<sub>520-559</sub> (BRD2<sub>520-559</sub> + 4[O]; brown inverse triangles) in the presence of varied BRD2<sub>520-559</sub> concentrations: (d) 10  $\mu$ M; (e) 8  $\mu$ M; (f) 6  $\mu$ M; (g) 4  $\mu$ M; (h) 2  $\mu$ M; (i) 1  $\mu$ M; (j) 0.8  $\mu$ M; (k) 0.6  $\mu$ M; (l) 0.4  $\mu$ M.

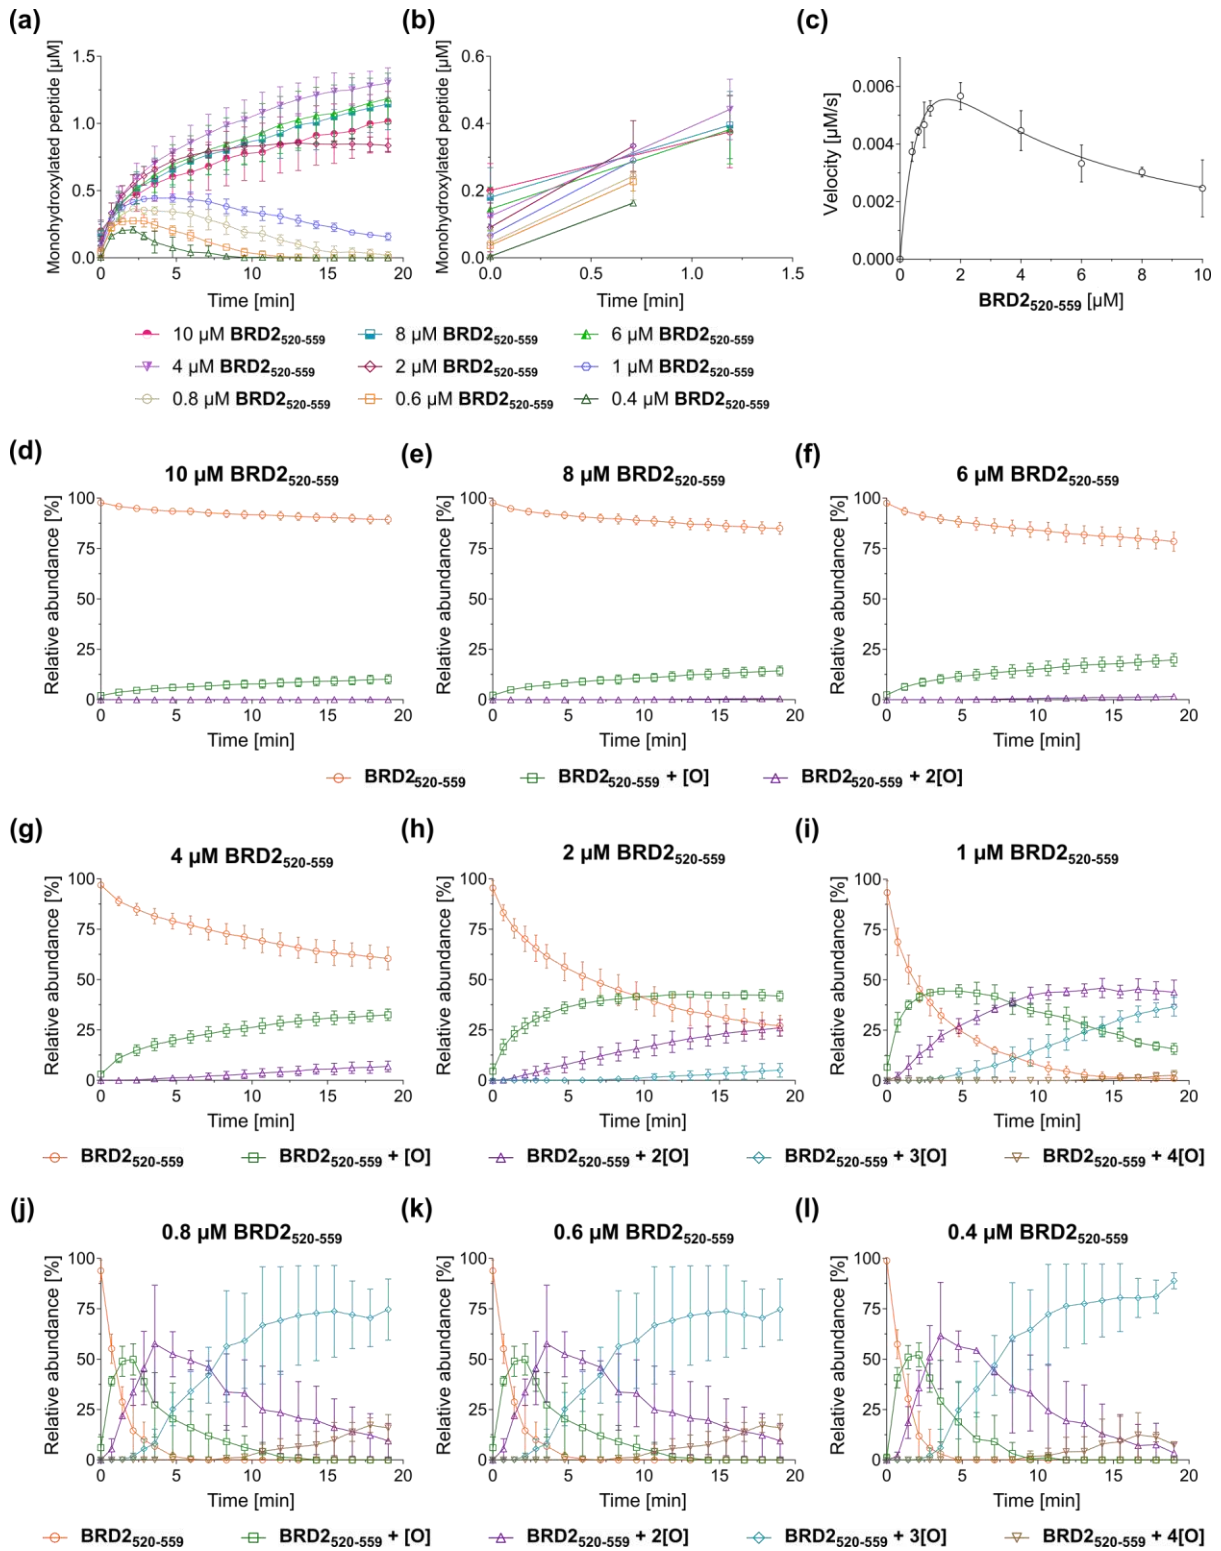

**Supplementary Figure S8. Determination of the JMJD6 kinetic parameters for BRD3<sub>463-502</sub> (continues on the following page).** SPE-MS was used to determine the extent of JMJD6-catalysed mono- and di-hydroxylation of the BRD3<sub>463-502</sub> fragment peptide for the specified BRD3<sub>463-502</sub> concentrations. Initial rates of the JMJD6-catalysed mono-hydroxylation of BRD3<sub>463-502</sub> were used to determine the maximum velocity ( $v_{max}^{app}$ ) and Michaelis constant ( $K_m^{app}$ ) of JMJD6 for BRD3<sub>463-502</sub>. Measurement times were normalized to the first sample injection analysed after the addition of the JMJD6 enzyme mixture to the substrate mixture, by which time low levels of BRD3<sub>463-502</sub> mono-hydroxylation were manifest. Data are the mean of three independent runs (n = 3; mean ± SD). Conditions: His<sub>6</sub>-JMJD6 (50 nM), 2OG (200 μM), FAS (2 μM), BRD3<sub>463-502</sub> (as specified) and LAA (100 μM) in Tris buffer (50 mM, pH 7.5).

(a) Abundance of the mono-hydroxylated BRD3<sub>463-502</sub> peptide, following the addition of 50 nM JMJD6 to the substrate mixture (t = 0 min), for the specified BRD3<sub>463-502</sub> concentrations; (b) initial reaction velocities used for the kinetic analysis of the JMJD6-catalysed mono-hydroxylation of BRD3<sub>463-502</sub>; (c) Michaelis-Menten curve used to determine the kinetic parameters of JMJD6 for BRD3<sub>463-502</sub>. The JMJD6  $v_{max}^{app}$  and  $K_m^{app}$  values of JMJD6 for BRD3<sub>463-502</sub> are  $5.2 \pm 1.3 \cdot 10^{-3} \mu\text{M} \cdot \text{s}^{-1}$  and  $1.2 \pm 0.4 \mu\text{M}$ , respectively, as determined by non-linear regression; (d-m) time course of the JMJD6-catalysed hydroxylation of BRD3<sub>463-502</sub> showing the relative abundance of the BRD3<sub>463-502</sub> substrate (BRD3<sub>463-502</sub>; orange circles), mono-hydroxylated BRD3<sub>463-502</sub> (BRD3<sub>463-502</sub> + [O]; green squares), di-hydroxylated BRD3<sub>463-502</sub> (BRD3<sub>463-502</sub> + 2[O]; purple triangles) and tri-hydroxylated BRD3<sub>463-502</sub> (BRD3<sub>463-502</sub> + 3[O]; light blue diamonds) in the presence of varied BRD3<sub>463-502</sub> concentrations: (d) 10 μM; (e) 8 μM; (f) 6 μM; (g) 4 μM; (h) 2 μM; (i) 1 μM; (j) 0.8 μM; (k) 0.6 μM; (l) 0.4 μM; (m) 0.2 μM.



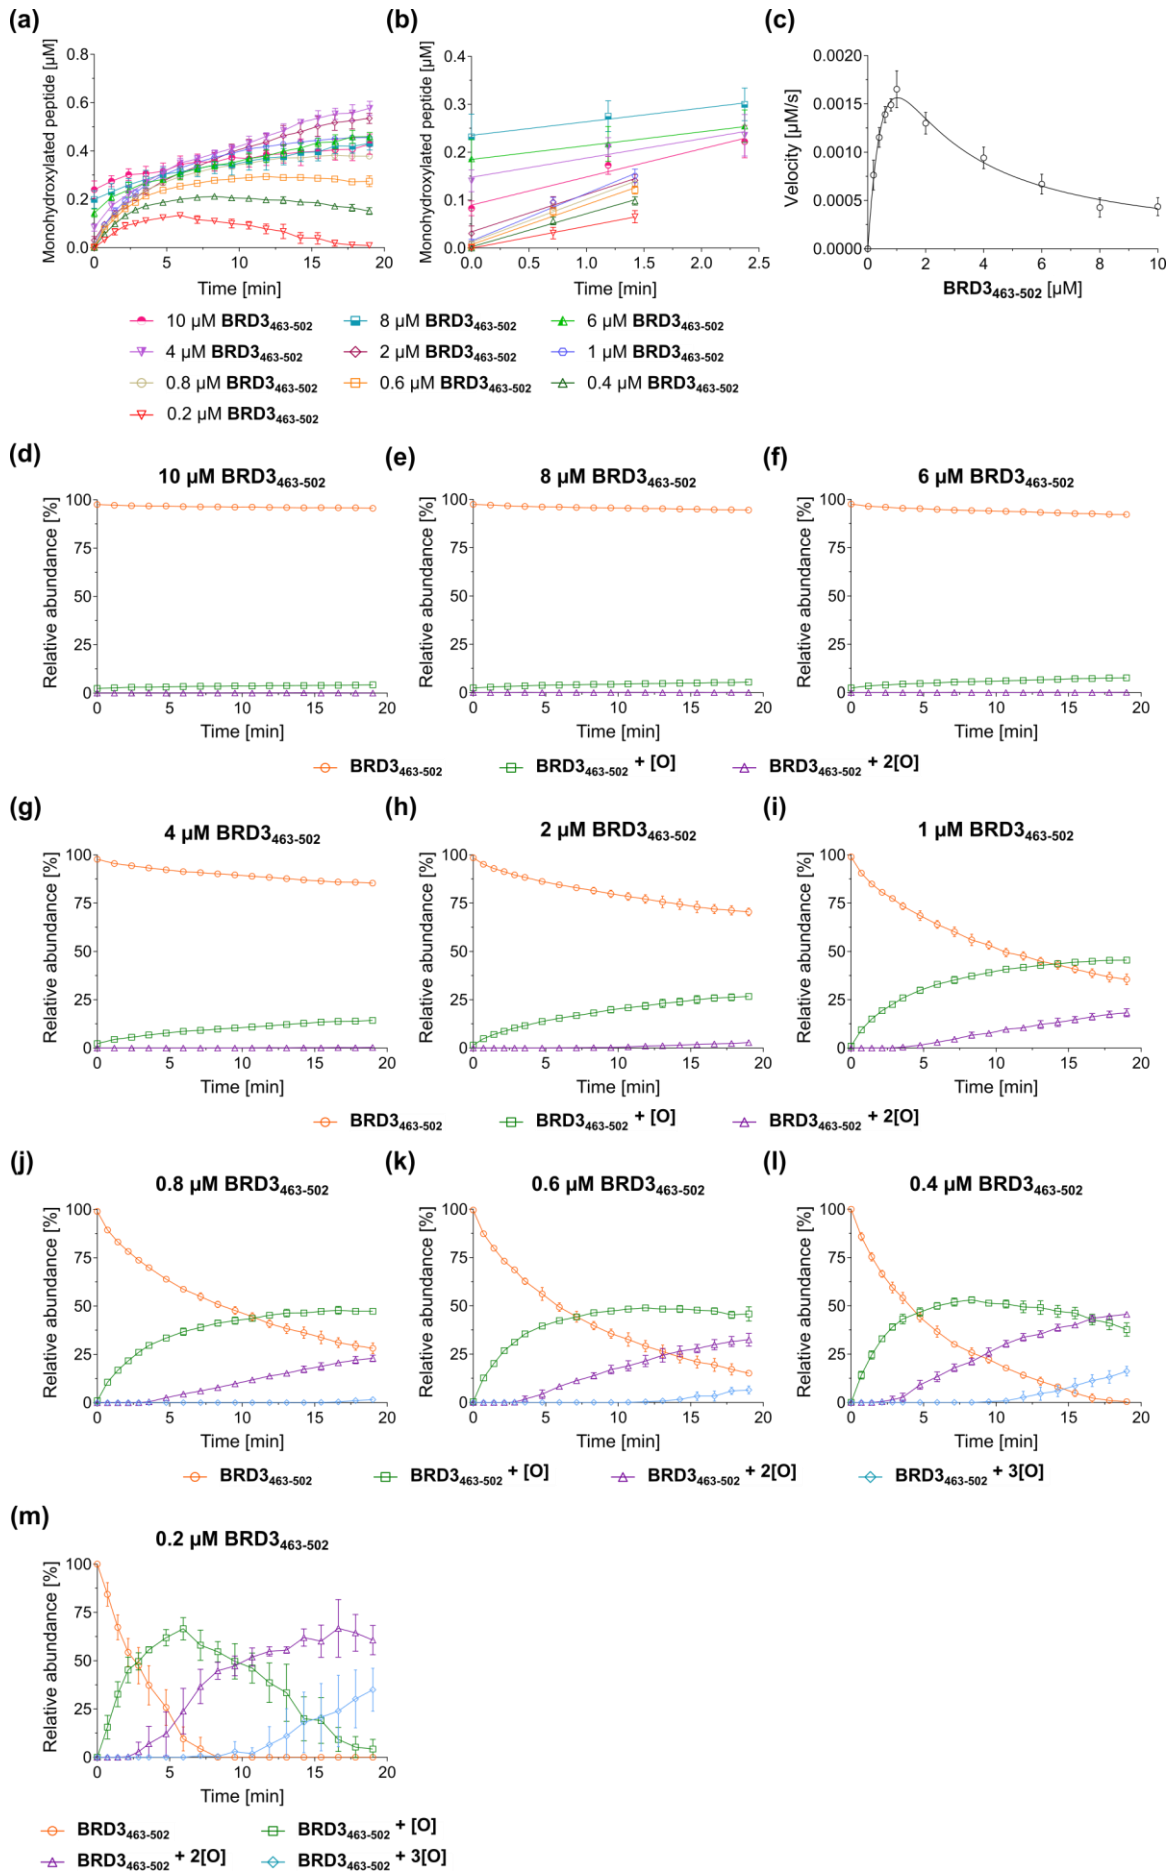

**Supplementary Figure S9. Determination of the JMJD6 kinetic parameters for O<sub>2</sub>.** SPE-MS was used to determine the extent of JMJD6-catalysed mono-hydroxylation of the BRD4<sub>511-550</sub> fragment peptide for the specified O<sub>2</sub> concentrations. The concentration of O<sub>2</sub> [%] in the reaction buffer was converted into O<sub>2</sub> [μM] by standard calibration ( $y_{[\mu\text{M}]} = 9.026 \cdot x_{[\%]}$ ).<sup>2</sup> Hydroxylation reactions used to determine the JMJD6 kinetic parameters for O<sub>2</sub> were performed at 37 °C and quenched after 60 or 90 s, as indicated. Data are the mean of three independent runs (n = 3; mean ± SD). Note, no evidence for di- (or higher order) hydroxylation of BRD4<sub>511-550</sub> was observed under the reaction conditions used. Conditions: His<sub>6</sub>-JMJD6 (50 nM), 2OG (200 μM), FAS (2 μM), BRD4<sub>511-550</sub> (2 μM), LAA (100 μM) and O<sub>2</sub> (as specified) in Tris buffer (50 mM, pH 7.5) at 37 °C.

(a) Initial reaction velocities used for the kinetic analysis of the JMJD6-catalysed mono-hydroxylation of BRD4<sub>511-550</sub> under different partial pressures of O<sub>2</sub>; (b) Michaelis-Menten curve used to determine the kinetic parameters of JMJD6 for O<sub>2</sub>. The JMJD6  $v_{max}^{app}$  and  $K_m^{app}$  values of JMJD6 for O<sub>2</sub> are  $6.5 \pm 0.4 \cdot 10^{-3} \mu\text{M} \cdot \text{s}^{-1}$  and  $74.3 \pm 13.4 \mu\text{M}$ , respectively, as determined by non-linear regression.

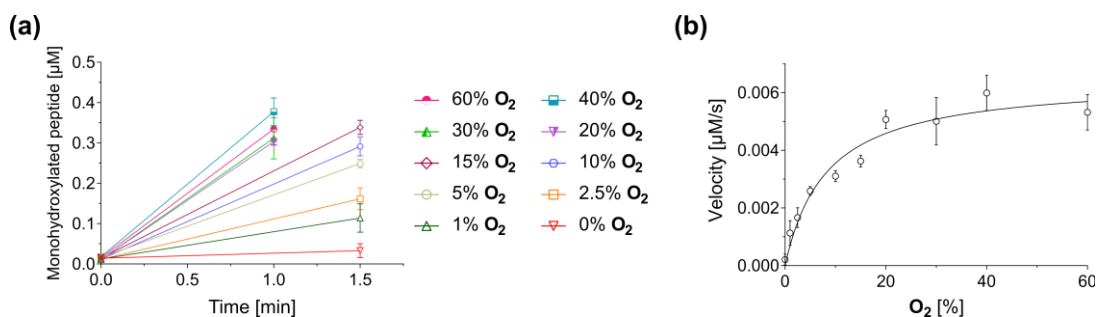

**Supplementary Figure S10. Consensus mechanism for 2OG oxygenase catalysis.** (a) 2OG oxygenases catalyse substrate oxidation (here: hydroxylation) in a manner coupled to the oxidative decarboxylation of 2OG to give succinate and carbon dioxide.<sup>3-5</sup> Note that some 2OG oxygenases catalyse the substrate uncoupled turnover of 2OG to succinate and CO<sub>2</sub>, at least in one case leading to a stable ternary enzyme:Fe(III):2OG complex.<sup>6</sup> (b) The proposed consensus mechanism for hydroxylation reactions catalysed by 2OG oxygenases.<sup>3</sup> Note, variations on this general catalytic cycle can occur, including with respect to the nature of the 2OG binding mode and the presence of Fe-binding waters, at different stages of catalysis.<sup>7, 8</sup> Mechanistic studies using isotopically labelled O<sub>2</sub> have revealed high levels of O from O<sub>2</sub> is incorporated into the alcohol products of reactions catalysed by human 2OG oxygenases.<sup>9-11</sup> By contrast, (partial) incorporation of isotopically labelled O from water into alcohol products has been observed for reactions catalysed by some bacterial and fungal dioxygenases.<sup>12-17</sup> Note, a consistently high level of a single isotopically labelled O from O<sub>2</sub> into the succinate coproduct has been reported.<sup>18</sup>

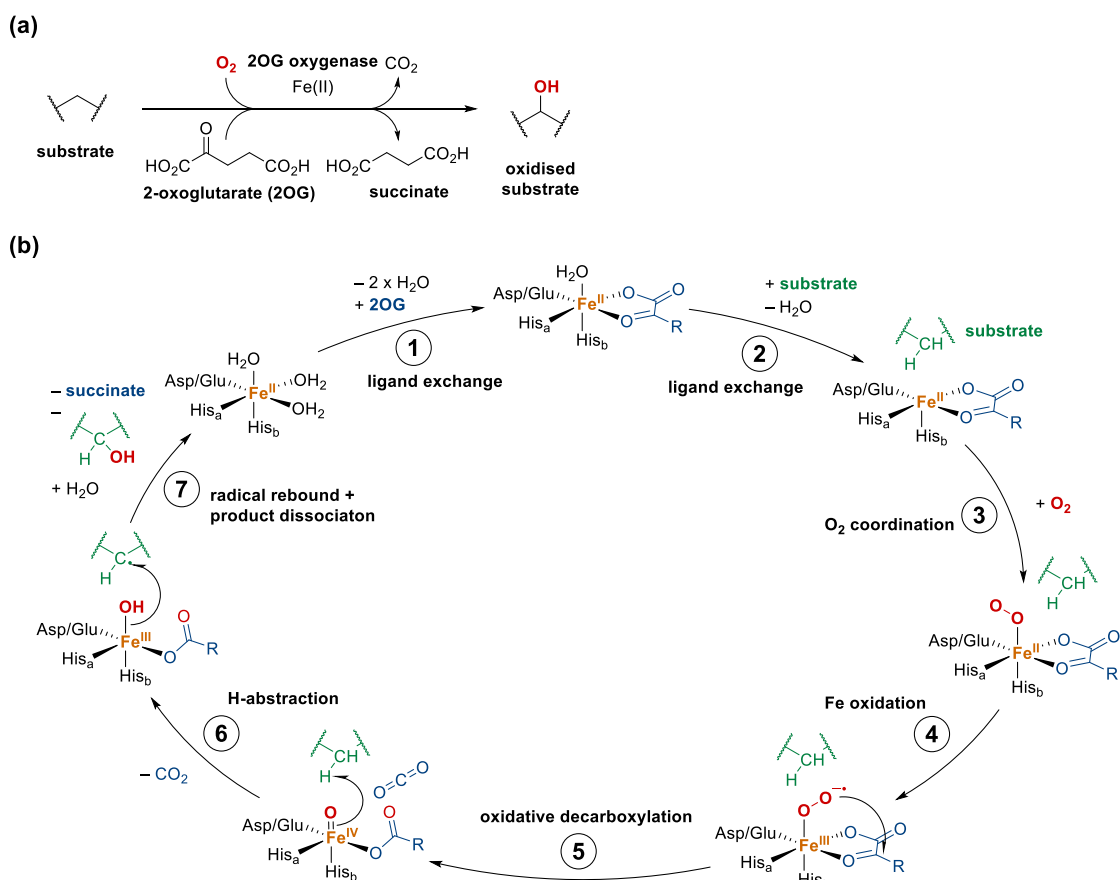

### 3. References

1. M. Mantri, C. J. Webby, N. D. Loik, R. B. Hamed, M. L. Nielsen, M. A. McDonough, J. S. O. McCullagh, A. Böttger, C. J. Schofield and A. Wolf, *MedChemComm*, 2012, **3**, 80-85.
2. R. L. Hancock, N. Masson, K. Dunne, E. Flashman and A. Kawamura, *ACS Chem. Biol.*, 2017, **12**, 1011-1019.
3. S. Martinez and R. P. Hausinger, *J. Biol. Chem.*, 2015, **290**, 20702-20711.
4. K. S. Hewitson, N. Granatino, R. W. D. Welford, M. A. McDonough and C. J. Schofield, *Philos. Trans. R. Soc. A*, 2005, **363**, 807-828.
5. C. J. Schofield and R. Hausinger, *2-Oxoglutarate-Dependent Oxygenases*, The Royal Society of Chemistry, 2015.
6. G. Fiorini, S. A. Marshall, W. D. Figg, W. K. Myers, L. Brewitz and C. J. Schofield, *Sci. Rep.*, 2024, **14**, 26162.
7. M. A. McDonough, C. Loenarz, R. Chowdhury, I. J. Clifton and C. J. Schofield, *Curr. Opin. Struct. Biol.*, 2010, **20**, 659-672.
8. A. Brasnett, I. Pfeffer, L. Brewitz, R. Chowdhury, Y. Nakashima, A. Tumber, M. A. McDonough and C. J. Schofield, *Angew. Chem. Int. Ed.*, 2021, **60**, 14657-14663.
9. E. Holme, G. Lindstedt, S. Lindstedt and M. Tofft, *J. Biol. Chem.*, 1971, **246**, 3314-3319.
10. W. Min, T. P. Begley, J. Myllyharju and K. I. Kivirikko, *Bioorg. Chem.*, 2000, **28**, 261-265.
11. L. A. McNeill, K. S. Hewitson, J. M. Gleadle, L. E. Horsfall, N. J. Oldham, P. H. Maxwell, C. W. Pugh, P. J. Ratcliffe and C. J. Schofield, *Bioorg. Med. Chem. Lett.*, 2002, **12**, 1547-1550.
12. J. E. Baldwin, R. M. Adlington, N. P. Crouch and I. A. C. Pereira, *Tetrahedron*, 1993, **49**, 7499-7518.
13. J. E. Baldwin, R. M. Adlington, N. P. Crouch, I. A. C. Pereira, R. T. Aplin and C. Robinson, *J. Chem. Soc., Chem. Commun.*, 1993, 105-108.
14. B. Lindblad, G. Lindstedt and S. Lindstedt, *J. Am. Chem. Soc.*, 1970, **92**, 7446-7449.
15. P. J. Sabourin and L. L. Bieber, *J. Biol. Chem.*, 1982, **257**, 7468-7471.
16. Y. Kikuchi, Y. Suzuki and N. Tamiya, *Biochem. J.*, 1983, **213**, 507-512.
17. J. E. Baldwin, R. M. Adlington, N. P. Crouch and C. J. Schofield, *Tetrahedron*, 1988, **44**, 643-650.

18. R. W. D. Welford, J. M. Kirkpatrick, L. A. McNeill, M. Puri, N. J. Oldham and C. J. Schofield, *FEBS Lett.*, 2005, **579**, 5170-5174.
